# Supplementary material
Source: Elsevier journal article supplement (https://www.sciencedirect.com/science/article/pii/S1888400816300319)
Supplement: mmc1 [file S1888400816300319:mmc1.doc]

**Anexo I. Caso práctico. Procedimiento de Obtención de Indicadores de Control del Grado de Cumplimiento de las Recomendaciones de No Hacer**

Uno de los objetivos principales en el diseño de indicadores es presentar una herramienta que nos permita conocer el grado de impacto y de cumplimiento que tienen estas recomendaciones en nuestro entorno.

Es muy importante que estos indicadores puedan ser monitorizados periódicamente para comprobar si las medidas y acciones adoptadas han tenido o no el efecto deseado.

Se describe a continuación, y a modo de ejemplo, el cálculo de los indicadores relacionados con la recomendación nº 2 del libro “Decisiones inteligentes desde el laboratorio: de elegir sabiamente a no hacer” .

***NO HACER HbA1c más de dos veces al año en pacientes diabéticos con buen control clínico y metabólico. Si es preciso realizar la determinación con mayor frecuencia, no hacerlo con periodicidad inferior a tres meses*.**

Se trata de familiarizar al usuario como debe organizar y extraer su información para obtener los datos finales del indicador. De esta manera, al realizar el proceso de manera estandarizada, puede ser incluido en un grupo de *benchmarking.*

Se trata de datos reales de un hospital público, lo denominaremos genéricamente Hospital General, de 500 camas cuyo laboratorio procesa aproximadamente 700 peticiones/día incluyendo Atención Primaria.

Las condiciones preliminares para poder obtener los resultados de los indicadores de proceso de esta recomendación nº 2 son:

- Conocer la prevalencia de diabetes en el área o el número de pacientes incluidos por Atención Primaria en programa de control de diabetes.
- El SIL debe indicar si el valor de HbA1c está fuera o dentro del rango de control.

*Datos iniciales*

En estos casos, si no se dispone de la identificación de los pacientes incluidos en programa de Atención Primaria de diabetes, se considera que coincide con el de diabéticos estimados ***(dato 2).***

La diferencia entre solicitudes ***(dato 4)*** y determinaciones ***(dato 5)*** se debe a que puede haber solicitudes sin resultado (muestra no remitida, problemas con la muestra, etc).

***Datos obtenidos por procesado de los resultados del sistema***

Necesitamos identificación única del paciente y los resultados de la prueba.

Para ello debemos configurar una exportación/estadística en nuestro SIL para obtener el número de pacientes a los que una o más veces se les ha solicitado HbA1c en el periodo de un año.


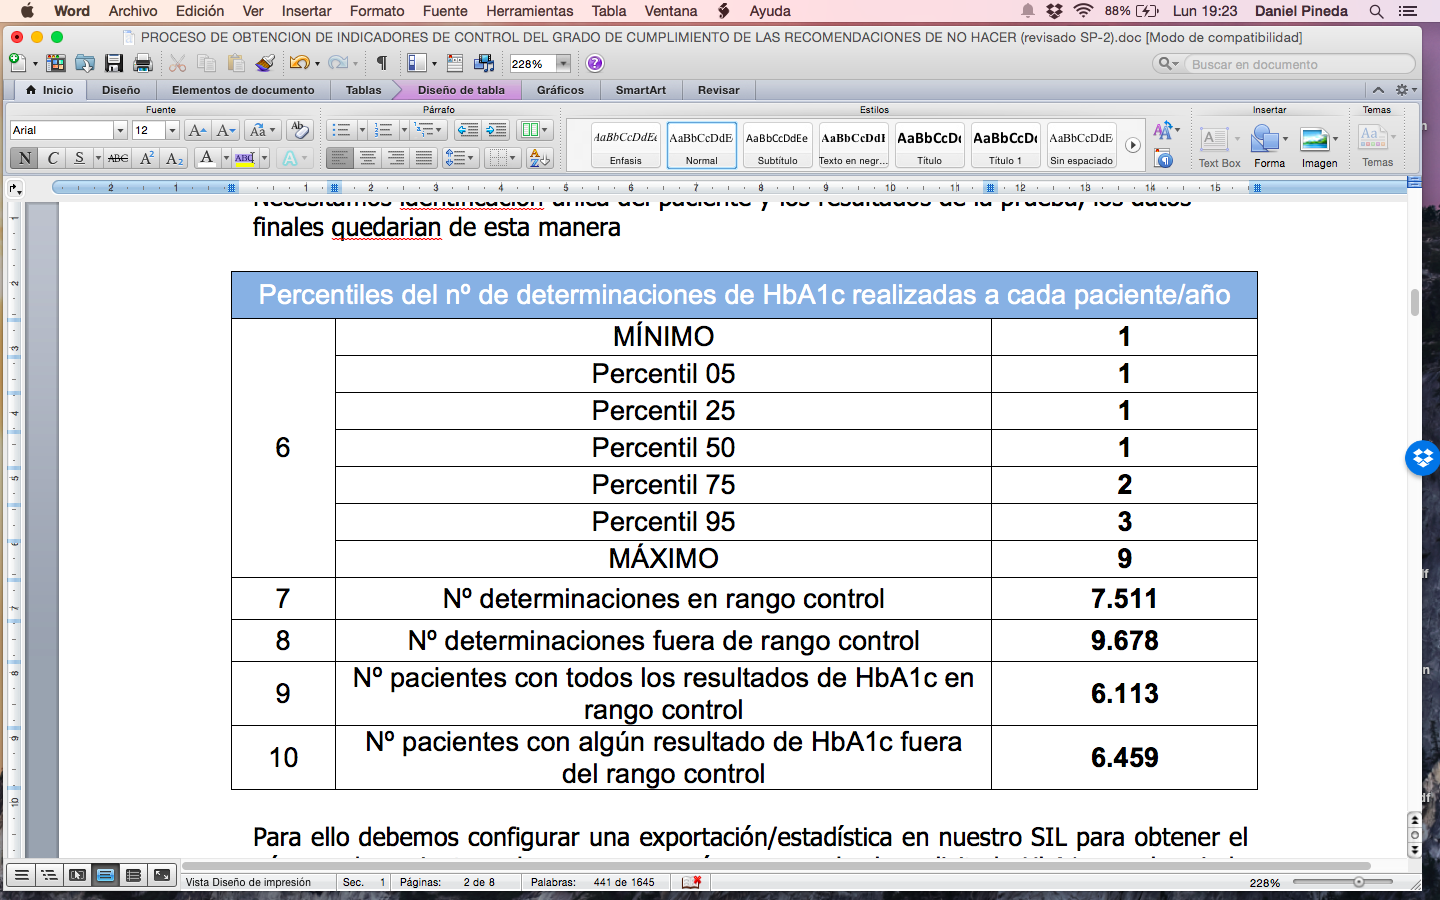


Si el SIL no nos proporciona esta información de manera directa, la segunda posibilidad es que el SIL construya un listado que contenga cada una de las peticiones de HbA1c realizadas en un año (ver ejemplo):

Después se puede obtener una nueva tabla donde aparece el listado de pacientes a los que se les ha solicitado alguna HbA1c. Para la obtención de esta nueva tabla será condición indispensable que exista un identificador único de paciente, como por ejemplo el Número de Tarjeta Sanitaria, nº CIPA, etc.

El listado obtenido debería ser similar a este, donde además figura el número de HbA1c realizadas a cada uno de los pacientes:

Mejor aún si podemos obtener los datos separando número de determinaciones dentro y fuera del rango de control.

**Indicadores de Proceso**

**P([HbA1c];[ /Hbt];[año];[-])**


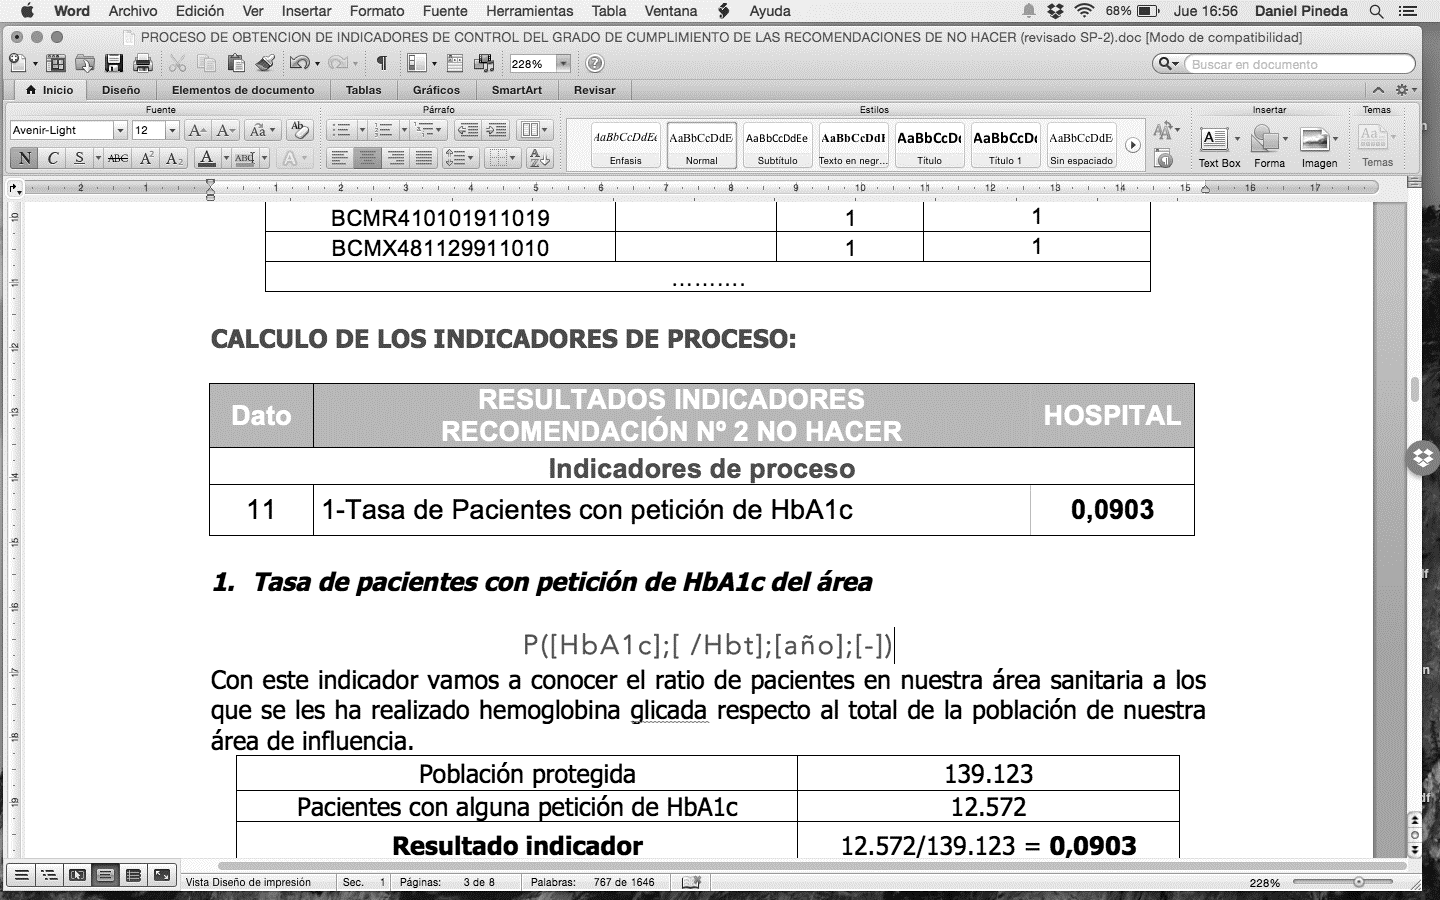


Con este indicador vamos a conocer el ratio de pacientes en nuestra área sanitaria a los que se les ha realizado Hb1Ac respecto al total de la población de nuestra área de influencia.

**2.- Nº de determinaciones de HbA1c/Nº pacientes con petición de Hb A1c**

**D([HbA1c]; [PL]; [año];[-]) / P([HbA1c]; [PL];[año];[-])**


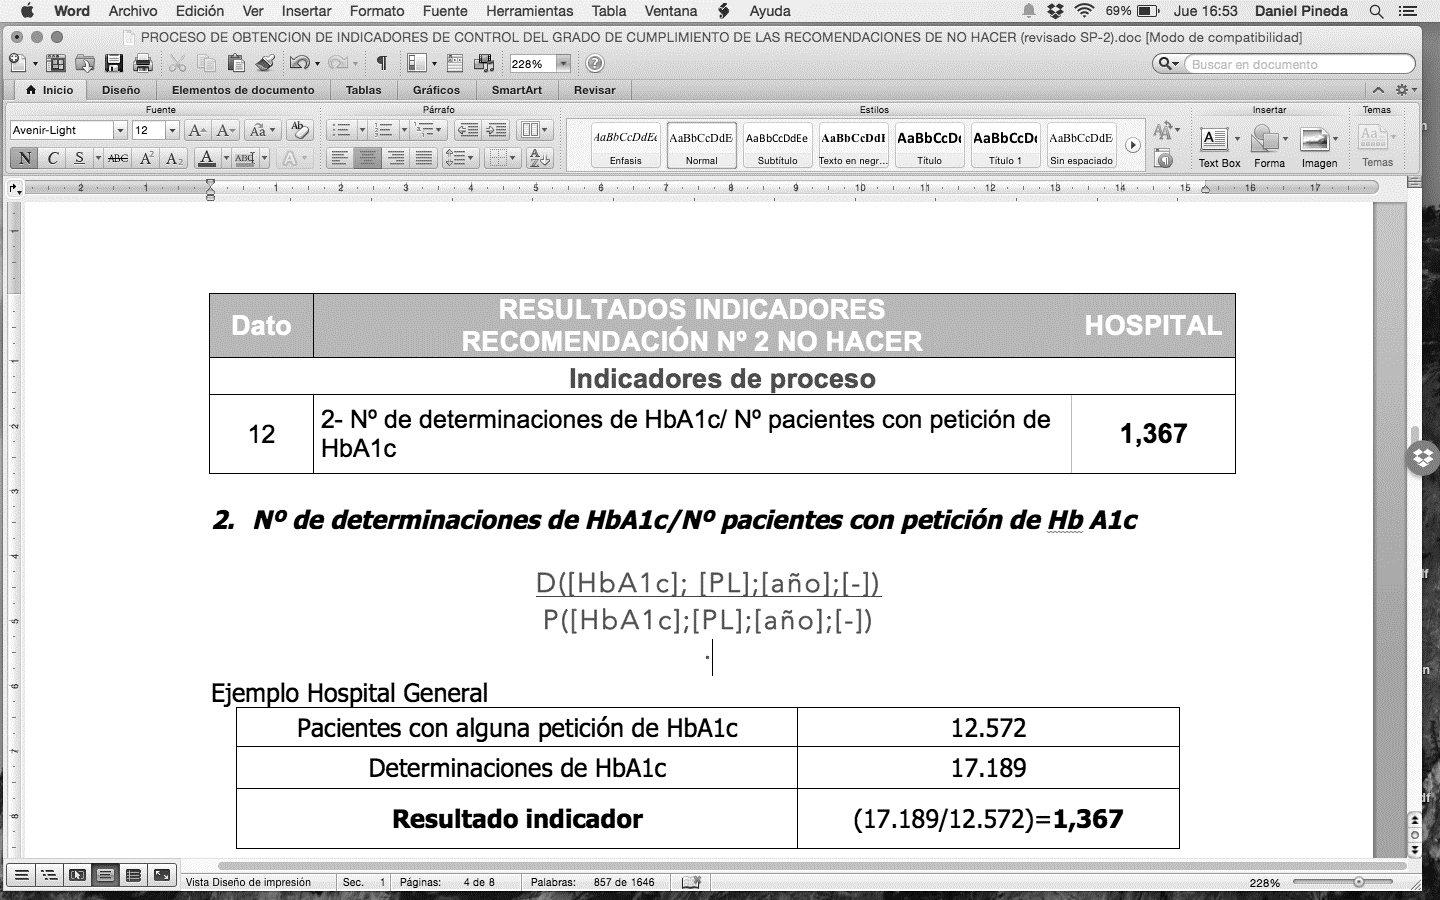


**3a.- Nº de determinaciones de HbA1c en rango de control/Nº pacientes con petición de HbA1c en rango de control**

**D([HbA1c];[PL];[año];[HbA1c en rango de control])/P([HbA1c];[PL];[año];[ HbA1c en rango de control])**

**3b.- Nº de determinaciones/Nº pacientes con algún dato fuera de control**

**D([HbA1c];[PL];[año];[algún dato HbA1c fuera de control])/P([HbA1c];[PL];[año];[algún dato HbA1c fuera de control])**

Estos indicadores, igual que el anterior, nos relacionan el número de determinaciones de HbA1c realizadas a cada paciente, pero en este caso se tiene en cuenta el resultado de la prueba.

Para realizar el cálculo de ambos indicadores debemos recodificar el resultado cuantitativo de la HbA1c en variable dicotómica (patológico/normal)

Es importante identificar que *son los pacientes los que definen el número de determinaciones que hay en el numerador*.

A partir de la tabla que separaba por pacientes, clasificamos si el valor está en rango o fuera de él

Separaremos el listado de pacientes en dos grupos o listados distintos:

**Listado A: Los pacientes que tienen todas las determinaciones en rango de control**

Pacientes (total pacientes del listado A).

Determinaciones (total determinaciones). Todas están en rango de control.

**Listado B: Los pacientes que tienen alguna determinación fuera de rango de control**

Pacientes (total pacientes del listado B).

Al menos una determinación por paciente está fuera del rango de control.

Determinaciones (total determinaciones). En rango de control y fuera de rango de control.


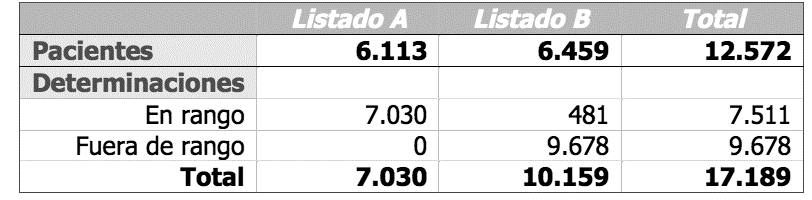


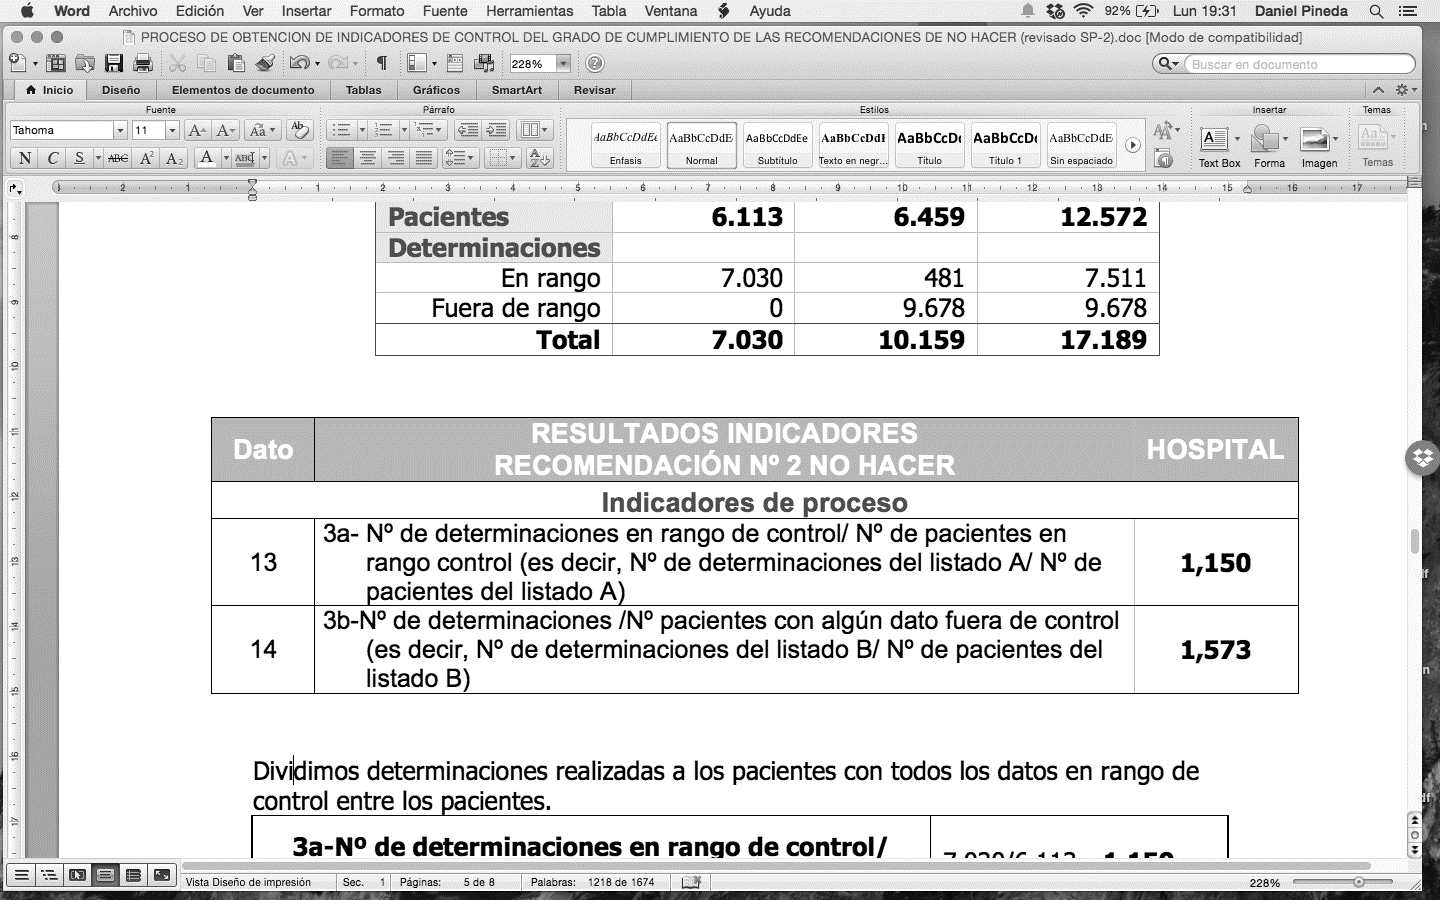


Dividimos determinaciones realizadas a los pacientes con todos los datos en rango de control entre los pacientes que tienen todas sus HbA1c dentro de rango de control

Dividimos las determinaciones de HbA1c realizadas a los pacientes que tienen al menos una HbA1c fuera de rango de control entre los pacientes que tienen al menos una HbA1c fuera de rango de control.

**Indicadores de Resultados en Salud**

La valoración de los resultados en salud son los más importantes porque refleja el impacto que tiene la actividad de los laboratorios clínicos en los pacientes en particular y en la sociedad en general.


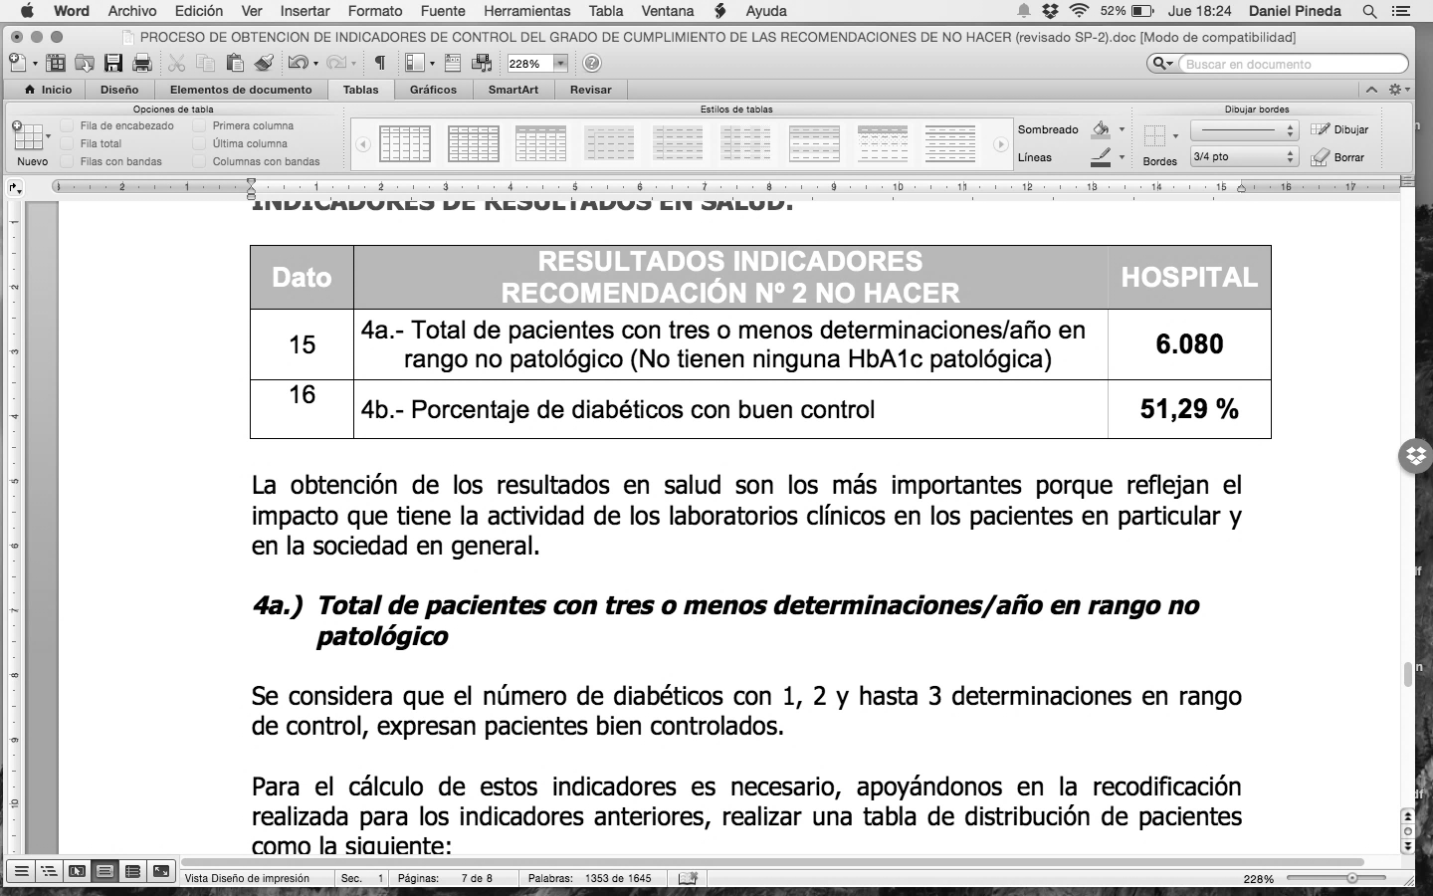


**4a.-Total de pacientes con tres o menos determinaciones/año en rango no patológico**

Se considera que el número de diabéticos con 1, 2 y hasta 3 determinaciones en rango de control, expresan pacientes bien controlados.

Para el cálculo de estos indicadores es necesario, reutilizar la tabla de distribución de pacientes:

Realizando un contaje de los pacientes que cumplen la condición de tener tres o menos determinaciones/año en rango no patológico, en este Hospital el número resultante en el ejemplo es de **6.080**.

**4b.- Porcentaje de diabéticos en programa con criterio de buen control**

Debido a la elevada prevalencia de la diabetes en nuestra población, las administraciones sanitarias suelen realizar programas de control de pacientes diabéticos tanto para el control de los ya diagnosticados como para la detección de nuevos casos.

Si conociéramos la población objeto de estos programas de control de diabetes, podríamos relacionar el indicador anterior con el número total de pacientes diagnosticados y por ende hacer una estimación del grado de control de los pacientes diabéticos en nuestra área sanitaria.

Considerando que todos estuvieran incluidos en el programa de Atención Primaria, siguiendo con nuestro caso real, la población diagnosticada de diabetes es de 11.853 (8.52 % del área de influencia) y por tanto el resultado del indicador sería:

(6.080/11.853) * 100= **51.29%**
